# Supplementary material for: Surface-specific visible light luminescence from composite metal oxide nanocrystals
Source: Springer Nature journal article supplement (doi:10.1007/s10853-015-9393-2), 2015-09-08
Supplement: MOESM1 [file 3534192]

## **Supporting Information: Surface Specific Visible Light Luminescence from Composite Metal Oxide Nanocrystals**

*Andreas Sternig<sup>1</sup>, Johannes Bernardi<sup>2</sup>, Keith McKenna<sup>3\*</sup>, Oliver Diwald<sup>4\*</sup>*

<sup>1</sup> Institute of Particle Technology, Friedrich-Alexander University Erlangen Nürnberg, Cauerstrasse 4,  
91058 Erlangen (Germany)

<sup>2</sup> Vienna University of Technology, University Servicecenter for TEM (USTEM), Wiedner Hauptstrasse  
8-10, 1040 Vienna (Austria)

<sup>3</sup> Department of Physics, University of York, Heslington, York YO10 5DD (United Kingdom)

<sup>4</sup> Department of Materials Science and Physics, University of Salzburg, Hellbrunner Strasser 34/III  
A-5020 Salzburg (Austria)

Email: keith.mckenna@york.ac.uk, oliver.diwald@sbg.ac.at

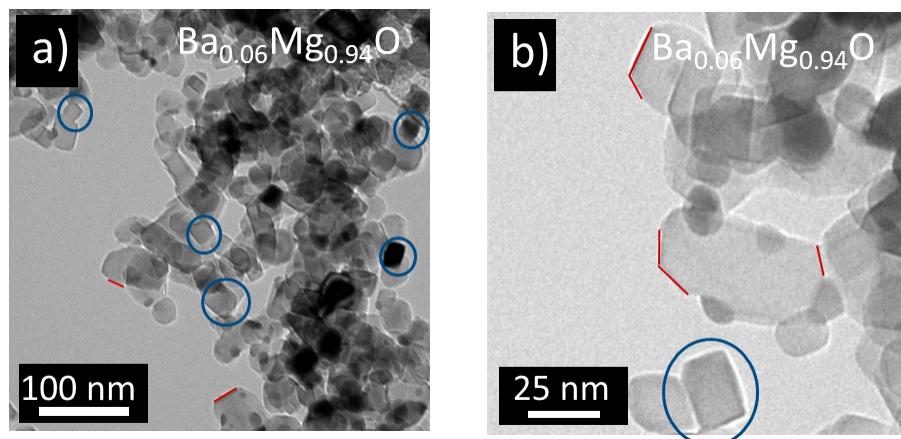

**Figure S1:** Transmission Electron Micrographs of  $\text{Ba}_{0.06}\text{Mg}_{0.94}\text{O}$  nanoparticles after vacuum annealing to  $T = 1173$  K. In comparison to MgO nanocubes and Ba-doped MgO nanoparticles of lower Ba content, these particles are morphologically less distinct. Some adopt cubic shape but have larger sizes than pure MgO particles (circles in Figure S1 a), others support rounded segregates (see also Figure S2).

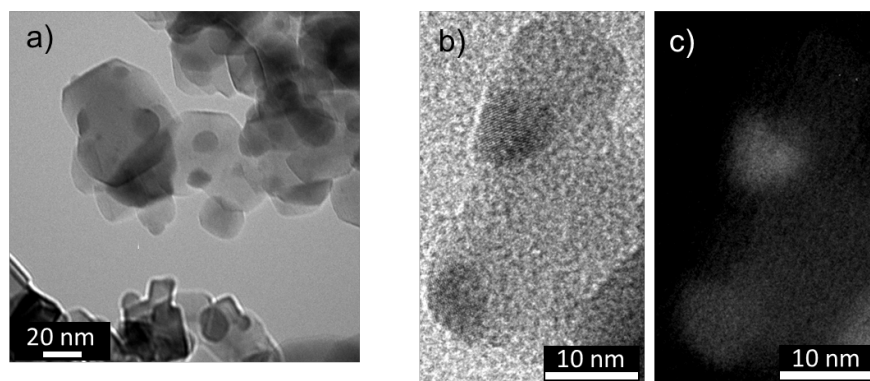

**Figure S2:** HR-TEM images (a and b) and energy filtering transmission electron microscopy images (c) showing that the rounded dark segregates are rich in Ba (bright area in the energy filtered Ba-map). For energy filtering transmission electron microscopy (EFTEM) investigations, the BaM45 edge at 781 eV was selected for Ba detection using the three-window method. Further details can be found in A. Sternig et al. *J. Phys. Chem. C*, 115 (2011) 15853.

**Table S1:** CIE1931 coordinates (x, y, z) for the photoluminescence emission spectra of  $\text{Ba}_{0.02}\text{Mg}_{0.98}\text{O}$ ,  $\text{Ba}_{0.04}\text{Mg}_{0.96}\text{O}$ , and  $\text{Ba}_{0.06}\text{Mg}_{0.94}\text{O}$  particles measured at 298 K and 77 K.

| Excitation Wavelength                      | Measurement Temperature | x      | y      | z      |
|--------------------------------------------|-------------------------|--------|--------|--------|
| $\text{Ba}_{0.02}\text{Mg}_{0.98}\text{O}$ |                         |        |        |        |
| 340 nm                                     | 298 K                   | 0.1915 | 0.2326 | 0.5758 |
|                                            | 77 K                    | 0.2280 | 0.2579 | 0.5142 |
| 390 nm                                     | 298 K                   | 0.2653 | 0.3610 | 0.3737 |
|                                            | 77 K                    | 0.3808 | 0.4680 | 0.1512 |
| $\text{Ba}_{0.04}\text{Mg}_{0.96}\text{O}$ |                         |        |        |        |
|                                            |                         | x      | y      | z      |
| 340 nm                                     | 298 K                   | 0.1639 | 0.1645 | 0.6715 |
|                                            | 77 K                    | 0.2302 | 0.2758 | 0.4941 |
| 390 nm                                     | 298 K                   | 0.2327 | 0.3239 | 0.4435 |
|                                            | 77 K                    | 0.3572 | 0.4736 | 0.1691 |
| $\text{Ba}_{0.06}\text{Mg}_{0.94}\text{O}$ |                         |        |        |        |
|                                            |                         | x      | y      | z      |
| 340 nm                                     | 298 K                   | 0.1650 | 0.1720 | 0.6630 |
|                                            | 77 K                    | 0.2221 | 0.2613 | 0.5166 |
| 390 nm                                     | 298 K                   | 0.2400 | 0.3367 | 0.4234 |
|                                            | 77 K                    | 0.3645 | 0.4697 | 0.1658 |
